# Supplementary material for: From Risk Factors to Predictive Modelling: Applying Machine Learning to Childhood Malaria Surveillance in Resource-Limited Settings
Source: Research Square preprint supplement (doi:10.21203/rs.3.rs-7352919/v1), 2025-09-11
Supplement: Supplementary file 1 [file 573345da3627c9768c0738ac.pdf]

**QUESTIONNAIRE FOR DATA COLLECTION ON  
PREVALENCE OF MALARIA AND ENVIRONMENTAL HEALTH FACTORS  
ASSOCIATED WITH UNDER-FIVE CHILDREN IN INTERNALLY DISPLACED  
PERSON'S CAMPS IN FEDERAL CAPITAL TERRITORY, ABUJA-NIGERIA**

**Consent Statement**

Dear Respondent,

We are researchers from the National Open University of Nigeria, conducting a research on the **Prevalence of Malaria and Environmental Health Factors Associated with Under-Five Children in Internally Displaced Person's Camps in Federal Capital Territory, Abuja-Nigeria**

This research is aimed at assessing the Prevalence of Malaria and environmental Health factors associated with under-Five Children in Internally Displaced Person camps through the evaluation of the knowledge Attitude and practices toward the prevention and control of malaria.

Please, kindly provide your honest responses to the questions in this research instrument in order to come up with a result that will inform decision-making.

Kindly note, that participation in this research is voluntary and the information provided is for research purposes only. The research is not sponsored by any organization or Company (ies), therefore, there is no apparent or probable conflict of interest.

Haven been properly informed and understood the purpose of the research, as a parent or caregiver of an under-five child, if you are willing to participate in the exercise, kindly put your signature in the space below as an indication of your consent

Signature.....

Date: .....

## Characteristic Identification Information of Caregiver /Parent of Under-five

Indicate by a tick [✓] in each of the boxes/spaces provided against the options as they best apply to you.

1. What is your Gender: Male ☐ Female ☐
2. what is your Age: < 18 years ☐ 18 - 30 years ☐ 31 - 45 years ☐ 46 – 60 Years ☐
3. Marital Status: Single ☐ Married ☐ separated/Divorce ☐
4. Name of IDP camp: **Area 1, Durumi** ☐ **Kuchingoro** ☐ **Lugbe** ☐  
**Kuje** ☐ **Wassa** ☐
5. Number of years in IDP Camp: less than a year ☐ 1-3years ☐ 4-6years ☐  
7years and above ☐
6. Educational Status: No formal Education ☐ Koranic Education ☐ Primary ☐  
SSCE ☐ OND/Equivalent ☐ ND/B.Sc. and Above ☐
7. What do you do for a living? Petty Trading ☐ Civil/public Servant ☐ Bic/Okada rider ☐  
Driver ☐ Farming ☐ No source of Income ☐  
Others Specify .....
8. Level of income per day: Less than ₦1000 ☐ ₦1000-₦2000 ☐ ₦2000-₦3000 ☐  
₦ 3000-₦4000 ☐ ₦4000-₦5000 ☐ Above ₦ 5000, specify.....
9. How many Children are depending on you: One ☐ Two ☐ Three ☐  
Four ☐ Five ☐ others specify.....
10. What is your relationship with the Child: Mother ☐ Father ☐ Sister ☐  
Extended Family Relation ☐ Adopted Child ☐  
Not related to the child but volunteer to care for the Child ☐ , Others specify:.....

### Characteristic Identification information of children under five years of Age

11. Age range of the Child(ren) under five: 0-12 Months (within 1 year) ☐  
13-24months (within 2 years) ☐ 25-36months (within 3years) ☐  
37-48months (within 4 year) ☐ 49-59months (within 5 years) ☐
12. Gender of the Child: Male ☐ Female ☐  
If there are twins or more children, state their Gender.....
13. Weight of the Child (Kg)
14. Length or Height of the Child (cm) :
15. Child's feeding within the First 6 months of birth: Exclusive Breast feeding ☐  
Breastmilk with water only ☐ Breastmilk supplementary feeding ☐  
Complimentary feeding ☐ No break feeding at all ☐ others specify...
16. Place of delivery: Home ☐ TBA ☐ Clinic/Hospital ☐ Church/mosque ☐  
Others specify.....
17. Is the child taking Routine Immunization for Children: yes ☐ No ☐ Not regular ☐

| Household characteristic information on factors influencing the prevalence of Malaria in under five |                                                                          |                                                                                                                                                                                                                       |
|-----------------------------------------------------------------------------------------------------|--------------------------------------------------------------------------|-----------------------------------------------------------------------------------------------------------------------------------------------------------------------------------------------------------------------|
| 1.                                                                                                  | Number of people in your household                                       | State the total number.....                                                                                                                                                                                           |
| 2.                                                                                                  | How many of these persons are in your Household                          | Men.....<br>Women.....<br>Children Age 5 and Above.....<br>Children Age 0-59 Months-----                                                                                                                              |
| 3.                                                                                                  | How many rooms in this household are used for sleeping?                  | One <input type="text"/> two <input type="text"/> Three <input type="text"/><br>Four or more <input type="text"/>                                                                                                     |
| 4.                                                                                                  | What is the main material of the roof of the Dwelling                    | 1. Metal sheet (Zinc)<br>2. Cement<br>3. Straw/thatch/palm leaf<br>4. Cardboard/planks<br>5. Plastic/ Tarpaulin<br>6. Other, specify _____                                                                            |
| 5.                                                                                                  | What is the main material of the walls of the dwelling                   | 1. Cement<br>2. Rammed earth/mud<br>3. Wood/boards<br>4. Bamboo<br>5. Plastic/ Tarpaulin<br>6. Metal sheet (Zinc)<br>7. Other, specify _____                                                                          |
| 6.                                                                                                  | What is the main material of the floor of the dwelling                   | 1. Cement<br>2. Tiles<br>3. Sand<br>4. Wooden boards<br>5. Other, specify _____                                                                                                                                       |
| 7.                                                                                                  | What is the main source of drinking water for members of your household? | 1. Pipe borne water<br>2. Borehole<br>3. protected well<br>4. unprotected well<br>5. Tanker truck<br>6. Rainwater<br>7. Cart with small water Tank<br>8. Surface water (Rivers/Dam /lake etc<br>Others, specify _____ |
| 8.                                                                                                  | Where is that water source                                               | 1. Within the IDP Camp:                                                                                                                                                                                               |

|     |                                                                                                             |                                                                                                                                                                                                                                    |
|-----|-------------------------------------------------------------------------------------------------------------|------------------------------------------------------------------------------------------------------------------------------------------------------------------------------------------------------------------------------------|
|     | Located                                                                                                     | 2. Elsewhere                                                                                                                                                                                                                       |
| 9.  | How long does it take to go there, get water, and come back?                                                | 1. within Minutes<br>2. One Hours and above<br>3. Don't Know                                                                                                                                                                       |
| 10. | What is the main source of water used by your Household for other purposes such as cooking and handwashing? | <div></div> 1. Pipe borne water<br>2. Borehole<br>3. protected well<br>4. unprotected well<br>5. Tanker truck<br>6. Rain water<br>7. Cart with small water Tank<br>8. Surface water (Rivers/Dam /lake etc<br>Others, specify _____ |
| 9.  | Is there Toilet facility available In the camp                                                              | 1. There is toilet<br>2. There is no toilet                                                                                                                                                                                        |
| 10. | If it is available, is it in use or not                                                                     | 1. In use<br>2. Not in use                                                                                                                                                                                                         |
| 11. | If there is toilet facility, what is the type?                                                              | 1. water closet toilet<br>2. Personal VIP latrine<br>3. Pour flush<br>4. Pit latrine<br>5. Bucket latrine<br>6. Stick/Cross bar latrine<br>7. Other, specify _____                                                                 |
| 12. | If the toilet is general toilet, is it used free without Payment                                            | 1. Pay before use<br>2. No payment required                                                                                                                                                                                        |
| 13. | If it is pay before use, do many people usually go there                                                    | 1. Very few people use it<br>2. Some people use it<br>3. So many use it                                                                                                                                                            |
| 14. | What is your assessment of the Toilet                                                                       | 1. Very Clean<br>2. Somehow clean<br>3. Dirty<br>4. Very Dirty                                                                                                                                                                     |

|     |                                                                                          |                                                                                                                                                                                                                                                                                                                                                                                                             |
|-----|------------------------------------------------------------------------------------------|-------------------------------------------------------------------------------------------------------------------------------------------------------------------------------------------------------------------------------------------------------------------------------------------------------------------------------------------------------------------------------------------------------------|
| 15. | If it Is general toilet, is it accessible                                                | <ol style="list-style-type: none"> <li>1. Day only</li> <li>2. Night only</li> <li>3. Day and night</li> <li>4. Always accessible at all things</li> </ol>                                                                                                                                                                                                                                                  |
| 16. | Is there water for flushing and hand washing in the toilet                               | <ol style="list-style-type: none"> <li>1. There is always water</li> <li>2. Sometimes no water</li> <li>3. No water at all</li> </ol>                                                                                                                                                                                                                                                                       |
| 17. | Is soap for washing of hands provided                                                    | <ol style="list-style-type: none"> <li>1. Always provided</li> <li>2. Sometimes not provided</li> <li>3. Not provided at all</li> </ol>                                                                                                                                                                                                                                                                     |
| 18. | Are rodents, flies and insects such as mosquitoes always roaming or flying in the toilet | <ol style="list-style-type: none"> <li>1. There are always there</li> <li>2. Sometimes, there are not there</li> <li>3. Not there at all</li> </ol>                                                                                                                                                                                                                                                         |
| 19. | Is the toilet adequate for the number of persons using it                                | <ol style="list-style-type: none"> <li>1. Very adequate</li> <li>2. Fairly adequate</li> <li>3. Not adequate</li> <li>4. Grossly inadequate</li> </ol>                                                                                                                                                                                                                                                      |
| 20. | Where is the location of the toilet                                                      | <ol style="list-style-type: none"> <li>1. Within the Camp</li> <li>2. Outside the camp but close</li> <li>3. Far away from the camp</li> </ol>                                                                                                                                                                                                                                                              |
| 21. | What is the type of cooking fuel                                                         | <ol style="list-style-type: none"> <li>1. Electricity</li> <li>2. Liquefied petroleum Gas (LPG)</li> <li>3. Natural Gas</li> <li>4. Biogas</li> <li>5. Kerosene</li> <li>6. Coal, lignite</li> <li>7. Charcoal</li> <li>8. Wood</li> <li>9. Straw/shrubs/grass</li> <li>10. Agricultural crop</li> <li>11. Animal dung</li> <li>12. No food cooked in household</li> <li>13. Others specify.....</li> </ol> |
| 22. | Which of these does your household have                                                  | <ol style="list-style-type: none"> <li>1. Radio</li> <li>2. Television</li> <li>3. Motor cycle</li> <li>4. Bicycle</li> <li>5. Car</li> <li>6. Refrigerator</li> <li>7. Others specify.....</li> </ol>                                                                                                                                                                                                      |
|     |                                                                                          |                                                                                                                                                                                                                                                                                                                                                                                                             |

| Knowledge about Malaria prevalence                                   |                                                                                                               |                                                                                                                                                                                                            |
|----------------------------------------------------------------------|---------------------------------------------------------------------------------------------------------------|------------------------------------------------------------------------------------------------------------------------------------------------------------------------------------------------------------|
| 23.                                                                  | Have you heard about malaria?                                                                                 | <ol style="list-style-type: none"> <li>1. Not at all</li> <li>2. Somehow</li> <li>3. Very well</li> </ol>                                                                                                  |
| 24.                                                                  | If you have heard about Malaria, which source have you heard about it?                                        | <ol style="list-style-type: none"> <li>1. Radio/TV/Social Media</li> <li>2. School</li> <li>3. Friends and neighbours</li> <li>4. Hospital</li> <li>5. Other, specify _____</li> </ol>                     |
| 25.                                                                  | Do you Know that, malaria is transmitted through Mosquito bite                                                | <ol style="list-style-type: none"> <li>1. Don't know</li> <li>2. Somehow</li> <li>3. I know it very well</li> </ol>                                                                                        |
| 26.                                                                  | Do you Know symptoms of malaria such as Fever, Headache, Chill, lack of appetite etc.                         | <ol style="list-style-type: none"> <li>1. Don't know the symptoms</li> <li>2. I know a little</li> <li>3. I know it very well</li> </ol>                                                                   |
| 27.                                                                  | Do you know that malaria can be prevented through Use of Insecticide treated net and environmental sanitation | <ol style="list-style-type: none"> <li>1. Don't know</li> <li>2. I know a little</li> <li>3. I know it very well</li> </ol>                                                                                |
| 28.                                                                  | Do you know that Malaria is not a cause from the ancestors or enemies                                         | <ol style="list-style-type: none"> <li>1. It is not true</li> <li>2. It is true</li> <li>3. Partially true</li> </ol>                                                                                      |
| 29.                                                                  | Do you also know that, Mosquitoes carries the agent Known as plasmodium that causes Malaria                   | <ol style="list-style-type: none"> <li>1. Don't know</li> <li>2. I know a little</li> <li>3. I know it very well</li> </ol>                                                                                |
| 30.                                                                  | Do you know that, malaria is preventable                                                                      | <ol style="list-style-type: none"> <li>1. I Don't know</li> <li>2. I know a little</li> <li>3. I know it very well</li> </ol>                                                                              |
| 31.                                                                  | Do you know that stagnant water breeds mosquitoes                                                             | <ol style="list-style-type: none"> <li>1. Don't know</li> <li>2. I know a little</li> <li>3. I know it very well</li> </ol>                                                                                |
| Attitudes and practices toward Identification of malaria in Children |                                                                                                               |                                                                                                                                                                                                            |
| 32.                                                                  | What do you do whenever your child fall sick and suspecting Malaria?                                          | <ol style="list-style-type: none"> <li>1. Do a Malaria test before medication</li> <li>2. Do self-medication</li> <li>3. Give the Child local herb for malaria</li> <li>4. Other, specify _____</li> </ol> |

|                                                                                   |                                                                                                               |                                                                                                                                                                     |
|-----------------------------------------------------------------------------------|---------------------------------------------------------------------------------------------------------------|---------------------------------------------------------------------------------------------------------------------------------------------------------------------|
| 33.                                                                               | What is the reason why<br>Sometimes you do not seek<br>Medical care for your child on<br>malaria?             | 1. Lack of money<br>2. Lack of time<br>3. The distance (too far)<br>4. It was not necessary<br>5. I don't know where to go<br>6. Other, specify _____               |
| 34.                                                                               | Where you are to seek medical<br>Care for your child on Malaria,<br>Where do you go?                          | 1. Health post/center<br>2. Pharmacy<br>3. Patent medicine Shop<br>4. Traditional practitioners<br>5. Modern/traditional self-medication<br>6. Other, specify _____ |
| 35.                                                                               | How long do you always take<br>before seeking medical care for<br>your child after appearance of<br>symptoms? | 1. Onset of symptoms<br>2. Severe symptoms<br>3. When I cannot manage it at home<br>4. Any time<br>5. Other, specify_____                                           |
| 36.                                                                               | Do you believe Malaria can be<br>cured without medical treatment                                              | 1. Agreed<br>2. Strongly agreed<br>3. Disagreed<br>4. Strongly Disagreed<br>5. I don't know                                                                         |
| 37.                                                                               | Is it important to confirm the<br>diagnosis of malaria at the health<br>facility before treatment             | 1. Agreed<br>2. Strongly agreed<br>3. Disagreed<br>4. Strongly Disagreed<br>5. I don't know                                                                         |
| 38.                                                                               | Is it necessary to finish a<br>treatment against malaria                                                      | 1. Agreed<br>2. Strongly agreed<br>3. Disagreed<br>4. Strongly Disagreed<br>5. I don't know                                                                         |
| <b>Environmental and structural factors associated with prevalence of Malaria</b> |                                                                                                               |                                                                                                                                                                     |
| 39.                                                                               | Stagnant water present within 5<br>metres of houses                                                           | 1. There is stagnant water everywhere within the camp<br>2. Only a few areas far away from the houses<br>3. No stagnant water at all                                |
| 40.                                                                               | Presence of vessels that could<br>potentially hold water for<br>Mosquito breeding                             | 1. There are scattered water-holding vessel every<br>within the camp<br>2. No such containers or vessels are in the camp                                            |



|                                      |                                                                                             |                                                                                                                                                                                                                                                                                                      |
|--------------------------------------|---------------------------------------------------------------------------------------------|------------------------------------------------------------------------------------------------------------------------------------------------------------------------------------------------------------------------------------------------------------------------------------------------------|
| 41.                                  | Presence of overgrown vegetation and water-bearing plants within 5 metres of houses         | <ol style="list-style-type: none"> <li>1. There are overgrown vegetation and water bearing plants everywhere within the camp</li> <li>2. Only a few and far away from the houses</li> <li>3. No overgrown vegetation and water bearing plants within the camp</li> </ol>                             |
| 42.                                  | House with windows lacking complete shutters                                                | <ol style="list-style-type: none"> <li>1. There are very many houses lacking shutters</li> <li>2. Only a few lack shutters</li> <li>3. No one lacks shutters</li> </ol>                                                                                                                              |
| 43.                                  | House with windows not fitting perfectly into wall (with space for possible mosquito entry) | <ol style="list-style-type: none"> <li>1. There are very many houses with windows not fitting perfectly into wall</li> <li>2. Only a few houses are with windows not fitting perfectly into wall</li> <li>3. All houses have windows fitting perfectly into the wall</li> </ol>                      |
| 44.                                  | House lacking screening in windows to prevent mosquito entry                                | <ol style="list-style-type: none"> <li>1. There are very many houses lacking screening in Windows, doors and ventilators</li> <li>2. Only a few houses lack screening</li> <li>3. All houses have are screened</li> </ol>                                                                            |
| <b>Malaria prevention approaches</b> |                                                                                             |                                                                                                                                                                                                                                                                                                      |
| 45.                                  | Do you have bed nets in the household?                                                      | <ol style="list-style-type: none"> <li>1. I have</li> <li>2. I don't have</li> <li>3. I can't tell</li> </ol>                                                                                                                                                                                        |
| 46.                                  | If you have, What is the brand/type of Mosquito net                                         | <p>Long-Lasting Insecticide Treated Net</p> <ol style="list-style-type: none"> <li>1. Brand A</li> <li>2. Brand B,</li> <li>3. Brand C,</li> <li>4. Others/Don't Know</li> </ol>                                                                                                                     |
| 47.                                  | Where did you get the Net                                                                   | <ol style="list-style-type: none"> <li>1. Government health facility</li> <li>2. Private health facility</li> <li>3. Pharmacy</li> <li>4. Shop/market</li> <li>5. Community Health workers</li> <li>6. Religious institution</li> <li>7. School</li> <li>8. Others</li> <li>9. Don't know</li> </ol> |
| 48.                                  | If you do not have net, why                                                                 | <ol style="list-style-type: none"> <li>1. Not Available</li> <li>2. I don't want it</li> <li>3. it is expensive to buy</li> <li>4. it is necessary</li> </ol>                                                                                                                                        |
| 49.                                  | If you have, what do you use                                                                | <ol style="list-style-type: none"> <li>1. I don't use it, still in the package</li> <li>2. Use it for covering at night against mosquito bite</li> <li>3. Use for other purposes like fishing,</li> </ol>                                                                                            |

|     |                                                                                   |                                                                                                                                                                                                      |
|-----|-----------------------------------------------------------------------------------|------------------------------------------------------------------------------------------------------------------------------------------------------------------------------------------------------|
|     | the net for                                                                       | fencing garden<br>4. Others specify.....                                                                                                                                                             |
| 50. | Do you and your children sleep under a bed net always?                            | 1. Only my Children sleep under net<br>2. Only myself sleep under net<br>3. All of us in the house<br>4. Nobody like sleeping under net                                                              |
| 51. | If Nobody like sleeping under Net, Why?                                           | 1. Very hot<br>2. Do not like the smell<br>3. I feel "trapped in the bed net."<br>4. No malaria currently<br>5. No mosquitoes currently<br>6. Bed net is too old and torn<br>7. Other, specify ----- |
| 52. | If You have being sleeping under bed net, How often do you sleep under a bed net? | 1. Every night<br>2. 3 to 6 times a week<br>3. less than 3 times per week                                                                                                                            |
| 53. | Did anyone sleep under this mosquito net last night?                              | 1. Yes<br>2. No<br>3. I am not Sure                                                                                                                                                                  |
| 54. | If Yes above, Who slept under this mosquito net last night?                       | 1. All of us<br>2. All the children<br>3. Only children under five                                                                                                                                   |
| 55. | In which season, do you like sleeping under a bed net?                            | 1. Rainy season<br>2. Dry season<br>3. All seasons<br>4. Don't know                                                                                                                                  |
| 56. | Do you use other means for prevention of mosquito bite?                           | 1. Yes<br>2. No                                                                                                                                                                                      |
| 57. | Indicate the other means you use                                                  | 1. Smoke coil<br>2. insecticide spray<br>3. Mosquito repellent grass<br>4. Wearing long clothes<br>5. Other, specify -----                                                                           |
| 58. | Is the General Environment clean enough for habitation                            | 1. Very Clean<br>2. Somehow clean<br>3. Dirty<br>4. Very Dirty                                                                                                                                       |
| 59. | Is there overgrown grasses and other water bearing plants around the camp         | 1. Everywhere<br>2. Some part of the camp<br>3. Not at all                                                                                                                                           |
| 60. | Are there waste bins provided in the Camp                                         | 1. Adequately provided<br>2. Provided but not adequate<br>3. Not provided at al                                                                                                                      |
| 61. | Is waste disposed-off whenever, there are filled up                               | 1. Regular disposal<br>2. Not regular<br>3. Allowed to littered every                                                                                                                                |

|     |                                                                   |                                                                                                                                                                                              |
|-----|-------------------------------------------------------------------|----------------------------------------------------------------------------------------------------------------------------------------------------------------------------------------------|
| 62. | Are you sure enough is being<br>done to prevent malaria infection | 1. Enough<br>2. Partially<br>3. Not enough                                                                                                                                                   |
| 63. | Which of these method do you<br>use to prevent malaria infection  | 1. Mosquito net<br>2. Insecticide<br>3. Smoke coil<br>4. Anti-malarial<br>5. Weeding<br>6. Wearing long clothes<br>7. Sewage disposal<br>8. Fan<br>9. Other, specify _____<br>10. Don't know |
